# Supplementary material for: Serum calcium and incident diabetes: an observational study and meta-analysis
Source: Springer Nature journal article supplement (doi:10.1007/s00198-015-3444-z), 2015-12-11
Supplement: MOESM6 [file 8161152]

Supplementary Figure 3. Association of serum calcium and incident diabetes stratified by predefined subgroups.

| a) Serum total calcium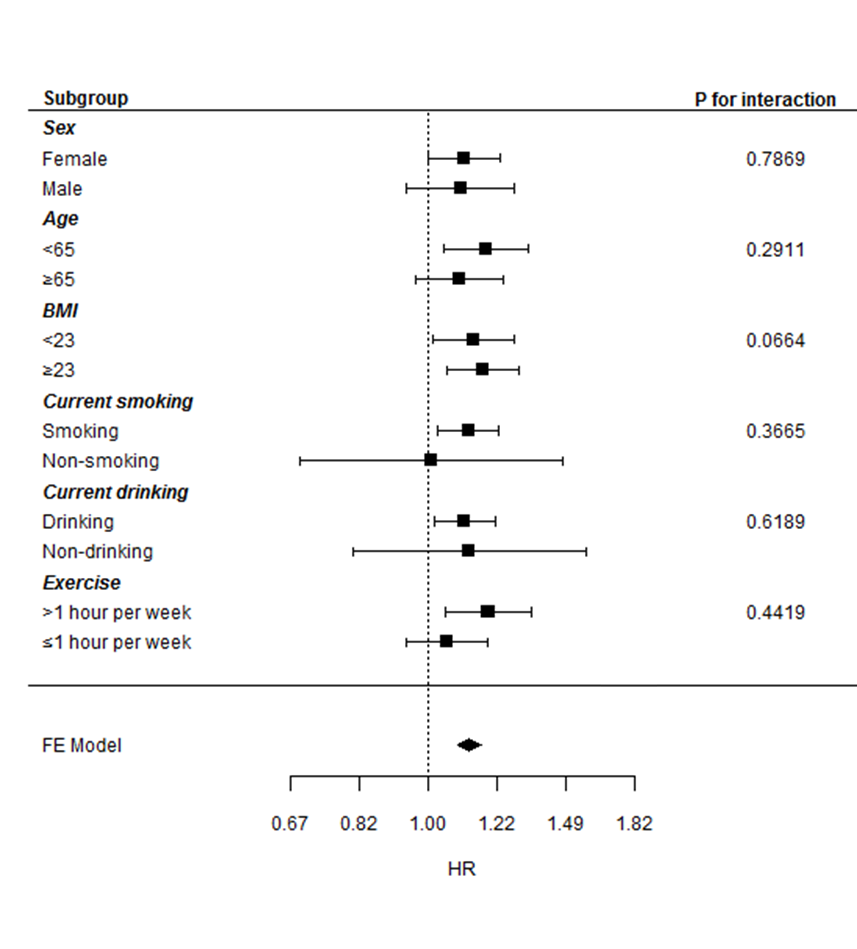 | b) Albumin-corrected calcium  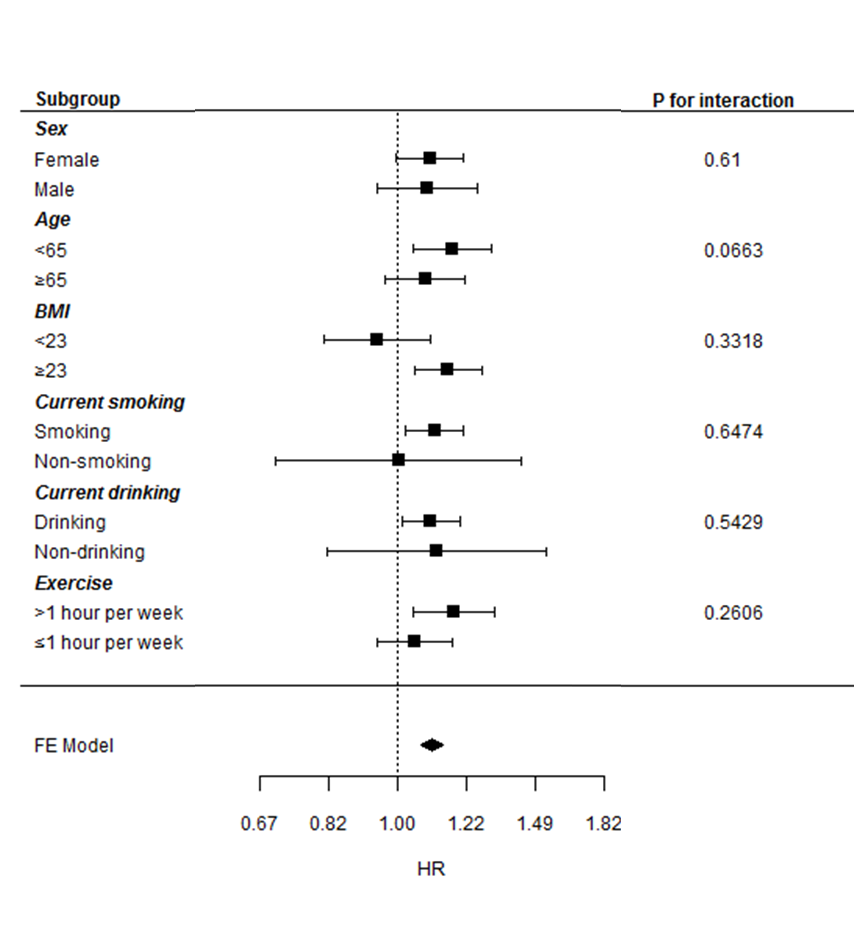 |
| --- | --- |
